# Supplementary material
Source: PubMed Central journal article supplement (PMC3123842)
Supplement: Supp_Data.pdf [file Supp_Data.pdf]

## SUPPLEMENTARY MATERIAL

### ESTIMATED REACTION RATE CONSTANTS FOR WILD-TYPE CELLS

|                  |              |
|------------------|--------------|
| $k_{in,Sa}$      | 98.9476      |
| $k_{SaP,Sa}$     | 0.0043       |
| $k_{DHCer,,Sa}$  | 1.4431       |
| $k_{Sa,SaP}$     | 0.0091       |
| $k_{Sa,DHCer}$   | 1.0362e + 04 |
| $k_{DHGC,DHCer}$ | 1.6826       |
| $k_{DHSM,DHCer}$ | 11.4186      |
| $k_{Cer,DHCer}$  | 4.0843       |
| $k_{DHCer,DHGC}$ | 2.9521       |
| $k_{DHCer,DHSM}$ | 1.2753       |
| $k_{DHCer,Cer}$  | 79.9867      |
| $k_{GC,Cer}$     | 0.0345       |
| $k_{SM,Cer}$     | 0.0025       |
| $k_{So,Cer}$     | 4.1425       |
| $k_{Cer,GC}$     | 0.0297       |
| $k_{Cer,SM}$     | 0.6535       |
| $k_{Cer,So}$     | 7.0930       |
| $k_{SoP,So}$     | 9.1800       |
| $k_{So,SoP}$     | 1.9684       |
| $k_{SoP,out}$    | 13.5627      |

### ESTIMATED REACTION RATE CONSTANTS FOR TREATED CELLS, I.E., SPT 1/2 OVER-EXPRESSING:

|                  |            |
|------------------|------------|
| $k_{in,Sa}$      | 360.7027   |
| $k_{SaP,Sa}$     | 0.0028     |
| $k_{DHCer,,Sa}$  | 0.0736     |
| $k_{Sa,SaP}$     | 0.2271     |
| $k_{Sa,DHCer}$   | 14.5170    |
| $k_{DHGC,DHCer}$ | 35.6403    |
| $k_{DHSM,DHCer}$ | 8.5091     |
| $k_{Cer,DHCer}$  | 13.1570    |
| $k_{DHCer,DHGC}$ | 0.0838     |
| $k_{DHCer,DHSM}$ | 3.9688     |
| $k_{DHCer,Cer}$  | 6.2111     |
| $k_{GC,Cer}$     | 6.1811e-06 |
| $k_{SM,Cer}$     | 0.0038     |
| $k_{So,Cer}$     | 0.0876     |
| $k_{Cer,GC}$     | 0.0302     |
| $k_{Cer,SM}$     | 0.1353     |
| $k_{Cer,So}$     | 0.3788     |
| $k_{SoP,So}$     | 13.9785    |
| $k_{So,SoP}$     | 1.4213     |
| $k_{SoP,out}$    | 6.7860     |
